# Supplementary material for: Late Paleocene CO 2 drawdown, climatic cooling and terrestrial denudation in the southwest Pacific
Source: Copernicus journal article supplement (doi:10.5194/cp-18-1295-2022), 2022-06-20
Supplement: Supplementary file 1 [file cp-18-1295-2022-supplement.zip]

Archive with 11 entries (11 files):
- Table_S7.xlsx
- Table_S6.xlsx
- Table_S4.xlsx
- Table_S8.xlsx
- Table_S2.xlsx
- Table_S1.xlsx
- Supplement.pdf
- Table_S3.xlsx
- Table_S5.xlsx
- Table_S9.xlsx
- cp-18-1295-2022-supplement-title-page.pdf
