# Supplementary material for: Late Paleocene CO 2 drawdown, climatic cooling and terrestrial denudation in the southwest Pacific
Source: Copernicus journal article supplement (doi:10.5194/cp-18-1295-2022), 2022-06-20
Supplement: Supplementary file 1 [file cp-18-1295-2022-supplement.zip › cp-18-1295-2022-supplement-title-page.pdf]

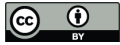

## *Supplement of*

# **Late Paleocene CO<sub>2</sub> drawdown, climatic cooling and terrestrial denudation in the southwest Pacific**

**Christopher J. Hollis et al.**

*Correspondence to:* Christopher J. Hollis ([chris.hollis@vuw.ac.nz](mailto:chris.hollis@vuw.ac.nz)) and Sebastian Naeher ([s.naeher@gns.cri.nz](mailto:s.naeher@gns.cri.nz))

- [cp-18-1295-2022-supplement-title-page.pdf](#)
- [Supplement.pdf](#)
- [Table\\_S1.xlsx](#)
- [Table\\_S2.xlsx](#)
- [Table\\_S3.xlsx](#)
- [Table\\_S4.xlsx](#)
- [Table\\_S5.xlsx](#)
- [Table\\_S6.xlsx](#)
- [Table\\_S7.xlsx](#)
- [Table\\_S8.xlsx](#)
- [Table\\_S9.xlsx](#)

The copyright of individual parts of the supplement might differ from the article licence.
