# Supplementary material for: Late Paleocene CO 2 drawdown, climatic cooling and terrestrial denudation in the southwest Pacific
Source: Copernicus journal article supplement (doi:10.5194/cp-18-1295-2022), 2022-06-20
Supplement: Supplementary file 1 [file cp-18-1295-2022-supplement.zip › Table_S1.xlsx]

## Sheet: Table S1
Table S1. Summary information on section and drillhole sites studied.
Section/drillhole	Waipawa	No. of	TOC	δ13COM	Age control1	Paleoenvironmental	Background paleodepth	Key references3
	thickness (m)	samples	median (wt%)	median (‰)		indicators2	(underlying formation)
North Slope Basin
Black's Quarry	Uncertain	11	10.2	-20.2	P	P	Upper to middle bathyal	1, 2
East Coast Basin
Te Hoe River	3	29	1.3	-22.2	P	F, P	Inner? shelf	3, 4
Tawanui	1	27	0.7	-20.8	N, P	F, P	Upper to middle bathyal	4
Taylor White	73	67	2.2	-20.2	N, P	F, P	Outermost shelf to upper bathyal	5, 6
Angora Road	30	25	2.4	-20.8	N, P	F, P	Outermost shelf to upper bathyal	4, 7
Orui-1A drillhole	80	39	2.3	-19.9	N, P	P	Upper to middle bathyal	8
Glendhu Rocks (Pahaoa River mouth)	0.5	14	0.4	-22.6	P		Middle to lower bathyal	This study
Marlborough Sub-Basin
Chancet Rocks	0.7	20	0.4	-22.1	R	F	Middle to lower bathyal	This study
Ben More Stream	1.5	10	1.7	-20.7	F	F	Middle to lower bathyal	This study
Mead Stream	2.5	75	1.7	-21.2	C, M, N, F, R	F, P	Upper to middle bathyal	4
Canterbury Basin
Mid-Waipara River	8	31	1.4	-19.7	M, N, P	F, P	Outer shelf	4
Galleon-1 drillhole	15	31			P	F, P	Inner to middle shelf	9
Great South Basin
Toroa-1 drillhole	22	18	6.3	-21	P	F, P	Nearshore to inner shelf	3, 10
Pakaha-1 drillhole	73	17	4.9	-19.7	P	F, P	Inner to outer shelf	3
Kawau-1A drillhole	70	28	6.2	-19.6	P	F, P	Middle to outer shelf	3
Hoiho-1C drillhole	22	10	11.3	-17.8	P	F, P	Outer shelf	3
East Tasman Plateau
ODP Site 1172	15	40	3	-20	M, P	F	Outer shelf	4, 11
Median	15		2.2	-20.7
Total		492
1 C - carbon isotopes, F - foraminifera, M - magnetostratigraphy, N - calcareous nannofossils, P - palynomorphs, R - radiolarians
2 F - foraminifera, P - palynofacies
3 1 - Hollis et al., 2006; 2 - Isaac et al., 1994; 3 - Schiøler et al., 2010; 4 - Hollis et al., 2014; 5 - Bland et al., 2014; 6 - Naeher et al., 2019; 7 - Leckie et al, 1995; 8 - Field et al., 2018; 9 -Schiøler, 2011; 10 - Raine et al., 1993; 11 - Bijl et al. 2021.
