# Supplementary material for: Late Paleocene CO 2 drawdown, climatic cooling and terrestrial denudation in the southwest Pacific
Source: Copernicus journal article supplement (doi:10.5194/cp-18-1295-2022), 2022-06-20
Supplement: Supplementary file 1 [file cp-18-1295-2022-supplement.zip › Table_S5.xlsx]

## Sheet: Table S5
Table S5. Bulk organic matter, total hydrocarbon fraction and compound-specific carbon isotope data for Taylor White and additional sections.
Taylor White section
Sample details				TOC	Carbon isotopes (‰)																						Mean of odd n-alkanes
Sample no.	Height	Formation	Facies1	(wt%)	Bulk	Hydrocarbon fractions			Compound specific
											LMW		MMW							HMW							MMW	HMW
	(m)				δ¹³COM	δ¹³CSat	δ¹³CAro	Difference	Pristane	Phytane	nC18	nC19	nC20	nC21	nC22	nC23	nC24	nC25	nC26	nC27	nC28	nC29	nC30	nC31	nC32	nC33
TW-57	147.5	Wanstead	Wanstead	0.13	-25.43	-28.7	-28.1	0.6
TW-55	144.5	Wanstead	Wanstead		-26.6						-30.0635	-30.7241	-30.0528	-29.7468	-29.3796	-30.0828	-29.4726	-29.8038	-29.4118	-28.9038	-29.5516	-30.5229	-30.0219	-31.4721	-29.969	-32.0038	-29.8778	-30.7257
TW-54	143	Wanstead	Wanstead	0.19	-26.8	-27.8
TW-53	141.5	Wanstead	Wanstead	0.27	-26.6	-28.6
TW-52	140	Waipawa	OM-poor	0.21	-21.7
TW-51C	139.5	Waipawa	OM-poor	0.36	-22.84
TW-51A	138.5	Waipawa	OM-poor	0.9	-21.03
TW-51*	138	Waipawa	OM-rich	2.76	-18.89	-27.6	-22.8	4.8				-28.7021	-27.7176	-27.7871	-27.8797	-27.4706	-27.261	-27.3975	-27.9822	-28.3471	-29.7888	-30.1589	-30.5929	-31.2597	-31.8846	-31.2114	-27.5517	-30.2443
TW-50	137	Waipawa	OM-rich	3.27	-18.56
TW-49*	135.5	Waipawa	OM-rich	3.79	-18.61	-27.1	-22.9	4.2	-26.6277	-25.5866		-28.5166	-27.4273	-27.4896	-27.7413	-27.1206	-26.794	-27.1549	-28.0162	-28.5323	-29.5235	-29.7401	-29.388	-31.1734	-28.2041	-31.1552	-27.255	-30.1503
TW-47	132.5	Waipawa	OM-poor	1.74	-16.67
TW-44	128	Whangai	OM-poor	1.23	-25.06	-28.9	-26.9	2
TW-43	126.5	Waipawa	OM-rich	2.17	-21.52
TW-41*	123.5	Waipawa	OM-rich	2.21	-21.22	-28.3	-24.2	4.1	-28.187	-29.5147				-28.3497	-29.1994	-28.0362	-27.8085	-28.2974	-28.4015	-28.5562	-29.4787	-31.1255	-30.2383	-32.3122	-31.182	-31.3707	-28.2278	-30.8412
TW-38	119	Waipawa	OM-rich	4.53	-17.83	-27.2	-23.3	3.9	-26.1605	-24.66
TW-37	117.5	Waipawa	OM-rich	4.62	-17.63	-29.6	-27	2.6	-25.3369	-25.5118
TW-35	114.5	Waipawa	OM-poor	1.61	-24.13								-28.757	-28.9946	-29.4171	-28.5083	-28.8304	-28.7723	-29.2102	-29.5882	-30.3674	-31.2638	-30.8832	-31.9297	-32.2996	-31.6584	-28.7584	-31.11
TW-32	110	Waipawa	OM-poor	1.49	-22.83
TW-31	108.5	Waipawa	OM-poor	1.46	-22.08	-28.9	-27.3	1.6
TW-29*	105.5	Waipawa	OM-rich	3.96	-18	-27.5	-22.9	4.6	-25.4549	-24.5123		-28.89	-27.1144	-27.2061	-27.4912	-26.9001	-27.151	-27.4612	-28.4476	-28.781	-30.3019	-30.1662	-29.7333	-31.3931	-30.6065	-29.9362	-27.1892	-30.0691
TW-26	101	Waipawa	OM-poor	1.94	-20.8
TW-25	99.5	Waipawa	OM-rich	2.42	-19.45	-27.6	-24.4	3.2	-26.5703	-26.4711
TW-23*	96.5	Waipawa	OM-rich	4.58	-17.38	-27.4	-22.7	4.7	-25.6945	-23.8659		-28.0009	-27.1841	-28.1209	-28.3048	-27.2101	-27.3153	-26.8684	-27.9227	-28.1153	-29.3899	-29.5554	-29.9679	-30.9558	-31.9217	-31.2646	-27.3998	-29.9728
TW-20	92	Waipawa	OM-rich	2.54	-18.7
TW-19	90.5	Waipawa	OM-poor	1.41	-23.25	-28.8	-28.4	0.4
TW-17	87.5	Waipawa	OM-rich	3.18	-18.2	-28.5	-24.7	3.8
TW-16	86	Waipawa	OM-rich	2.91	-18.8
TW-14	83	Waipawa	OM-rich	2.02	-20.44
TW-13	81.5	Waipawa	OM-poor	1.76	-21.24	-28.8	-25.6	3.2	-27.5108	-30.7014			-28.2156	-28.3809	-28.4219	-27.9382	-28.2463	-28.4475	-28.7846	-28.7684	-29.6908	-30.4426	-31.325	-31.658	-32.1568	-31.5668	-28.2555	-30.6089
TW-12	77	Waipawa	OM-poor	0.98	-22.34
TW-11	72.5	Waipawa	OM-poor	1.05	-22.8
TW-10	68	Waipawa	OM-poor	0.49	-23.2
TW-9	63.5	Whangai	Whangai	0.8	-26.57	-28.6	-28.5	0.1
TW-8	59	Whangai	Whangai	0.59	-26.4
TW-7*	54.5	Whangai	Whangai	0.94	-26.19	-28.6	-28.4	0.2	-29.7267	-31.3127	-29.6119	-31.3533	-30.2146	-30.0203	-29.619	-30.6262	-29.1594	-28.9633	-28.8945	-29.256	-30.9	-30.5633	-30.4015	-31.9799	-30.7603	-31.0953	-29.8699	-30.7236
TW-6	32	Whangai	Whangai	0.94	-27.08
TW-5	26.5	Whangai	Whangai	1.06	-26.27	-29	-28.3	0.7
TW-2	5.5	Waipawa	OM-rich	2.93	-17.64	-27.5	-25.9	1.6
	OM-rich			3.7725	-18.22	-27.4	-22.825	4.575	-25.9257	-24.6549		-28.5274	-27.3608	-27.6509	-27.8543	-27.1753	-27.1303	-27.2205	-28.0922	-28.4439	-29.751	-29.9052	-29.9205	-31.1955	-30.6542	-30.8918	-27.3489	-30.1091
	Whangai			0.94	-26.19	-28.6	-28.4	0.2	-29.7267	-31.3127		-31.3533	-30.2146	-30.0203	-29.619	-30.6262	-29.1594	-28.9633	-28.8945	-29.256	-30.9	-30.5633	-30.4015	-31.9799	-30.7603	-31.0953	-29.8699	-30.7236
	Difference			2.8325	7.97	1.2	5.575	4.375	3.80103	6.65773		2.82584	2.85376	2.36937	1.76472	3.45084	2.02906	1.74283	0.802266	0.812048	1.14898	0.65815	0.480965	0.784425	0.106026	0.203403	2.52102	0.614507
Correlation (r)	δ13COM			0.81599	1	0.494097	0.807818		0.964499	0.904459		0.968542	0.981047	0.9425	0.8846	0.954477	0.965669	0.958711	0.891249	0.754987	0.43768	0.642397	0.330855	0.588264	0.000877399	0.558466	0.983801	0.809908
Average value for OM-rich Waipawa (TW-51, 49, 41, 29, 23)				3.46	-18.82	-27.58	-23.1	4.48	-26.491	-25.8699		-28.5274	-27.3608	-27.7907	-28.1233	-27.3475	-27.2659	-27.4359	-28.1541	-28.4664	-29.6965	-30.1492	-29.9841	-31.4188	-30.7598	-30.9876	-27.5247	-30.2555
Average value for OM-poor Waipawa (TW-35, 13)				0.94	-26.19	-28.6	-28.4	0.2	-29.7267	-31.3127	-29.6119	-31.3533	-30.2146	-30.0203	-29.619	-30.6262	-29.1594	-28.9633	-28.8945	-29.256	-30.9	-30.5633	-30.4015	-31.9799	-30.7603	-31.0953	-29.8699	-30.7236
Other sections and drillholes (Sykes and Zink, 2012, and GNS Science unpublished results)
Sample details				TOC	Carbon isotopes (‰)																						Mean of odd n-alkanes
Section/drillhole	GNS no.	Formation	Facies1	(wt%)	Bulk	Hydrocarbon fractions			Compound specific
											LMW		MMW							HMW							MMW	HMW
					δ¹³COM	δ¹³CSat	δ¹³CAro	Difference	Pristane	Phytane	nC18	nC19	nC20	nC21	nC22	nC23	nC24	nC25	nC26	nC27	nC28	nC29	nC30	nC31	nC32	nC33
Black's Quarry	E012	Waipawa	OM-rich	9.66	-20.2	-23.9	-22.2	1.7	-27.1	-26	-27.7	-25.1	-25.3	-28	-28.4	-25.4	-27.1	-27.2	-26.7	-27.3	-27	-29.2	-28.1	-29.3	-30.8		-26.8667	-28.6
Black's Quarry	E013	Waipawa	OM-rich	10.84	-19.3	-23.9	-22.2	1.7	-26.4	-24.5	-26.8	-22.5		-32.8	-26.9	-26.8	-24.8	-25.5	-26.7	-26.1	-25.7	-30.3	-27.9	-29.4			-28.3667	-28.6
Te Weraroa Stream	E105	Waipawa	OM-rich	3.45		-26.8	-23.8	3	-28.9	-28.3	-29.9	-25.1		-31.8	-26	-26	-24.8	-27.9	-28.1	-27.1	-25.4	-31.5	-30.6	-27.2			-28.5667	-28.6
Te Weraroa Stream	E106	Waipawa	OM-rich	3.03		-25.6	-22.8	2.8
Angora Stream*	E107	Waipawa	OM-rich	5.18	-17.8	-28.2	-23.6	4.6	-24.4				-24.2	-26.5	-27	-27.3	-27.5	-27.1	-27.1	-27.1	-26.5	-27.2	-27.6	-26.9	-27.3	-27	-26.9667	-27.05
Angora Stream	E108	Waipawa	OM-rich	3.05	-18.2	-29.3
Angora Stream*	E109	Waipawa	OM-rich	4.07	-18.6	-28.7			-26.8	-24.3	-28.7	-29	-25.5	-29.3	-29.2	-27.5	-27.6	-27.3	-27.4	-27.5	-26.8	-28.1	-29.6	-27.8	-27.8	-28	-28.0333	-27.85
Angora Stream	E110	Waipawa	OM-poor	1.7	-21				-26.8	-27.8	-29.5	-26.4		-30.8	-30	-28.1	-28.7	-29.8	-26.2	-31.3	-29.8	-31.5	-27.3
Mead Stream	E111	Waipawa	OM-rich	2.94	-21				-24.5		-29.2	-28.5		-27.5	-27.3	-27.5	-27.4	-27.2	-27.2	-27.4	-27.1	-27.3	-28.2	-27.2	-27.1	-26.9	-27.4	-27.2
Mead Stream	E112	Waipawa	OM-poor	0.9	-24				-27.7	-28.8	-27.3	-29.6	-22.2	-27.8	-27.3	-27.4	-27.6	-27.6	-27.4	-27.7	-27.4	-27.7	-28.2	-27.3	-27.2	-27.1	-27.6	-27.45
Te Puia	E113	Waipawa	OM-rich	8.39		-24.3	-22.8	1.5	-26.3	-23.7	-30.3	-26.2	-21	-29.3	-24	-27.7	-25.6	-27.4	-27.7	-28	-25.7	-32.5		-29.5			-28.1333	-30
Kupe South-5	E051	Farewell	Coal	55.69		-29.7	-26.9	2.8
Kupe South-5	E052	Farewell	Shaly coal	27.49		-30.3	-27.2	3.1
Kupe South-5	E054	Farewell	Coal	56.71		-29.9	-27.5	2.4	-31.6	-31.9	-32.8	-31.2	-28.8	-30	-30.5	-30.4	-29.3	-29.9	-30.5	-30.9	-35.4	-34.3	-34.3	-27.9	-28.1		-30.1	-31.0333
Kupe South-5	E055	Farewell	Coaly mudstone	3.33		-30.7			-26.6		-27.6	-28.2	-28.8	-28.4	-28.6	-27.9	-29.8	-28.6	-32.2	-31.3	-32	-32	-32				-28.3	-31.65
Kapuni-13	E056	Farewell	Coal	57.28		-30.2	-28.1	2.1
Kapuni-13	E057	Farewell	Coaly mudstone	6.72		-30.2	-28.5	1.7
Tara-1	E232	Taratu	Coal	62.3		-29.9	-27	2.9
Tara-1	E233	Taratu	Coal	64.8		-30.3	-28.8	1.5
Tara-1	E234	Taratu	Coal	66.8		-30	-27.3	2.7
1 OM-rich = TOC >2.0%, OM-poor = TOC <2.0%
Average value for OM-rich Waipawa (Angora Stream, E107, E108)				4.625	-18.2	-28.45	-23.6	4.85	-25.6	-24.3	-28.7	-29	-24.85	-27.9	-28.1	-27.4	-27.55	-27.2	-27.25	-27.3	-26.65	-27.65	-28.6	-27.35	-27.55	-27.5	-27.5	-27.45
	Whangai (TW-7)			0.94	-26.19	-28.6	-28.4	0.2	-29.7267	-31.3127	-29.6119	-31.3533	-30.2146	-30.0203	-29.619	-30.6262	-29.1594	-28.9633	-28.8945	-29.256	-30.9	-30.5633	-30.4015	-31.9799	-30.7603	-31.0953	-29.8699	-30.7236
	Difference			3.685	7.99	0.15	4.8	4.65	4.12674	7.01267		2.35325	5.36459	2.12031	1.51897	3.22619	1.60936	1.76335	1.64446	1.95597	4.24999	2.9133	1.8015	4.62993	3.21027	3.59525	2.36995	3.27361
