# Supplementary material for: Late Paleocene CO 2 drawdown, climatic cooling and terrestrial denudation in the southwest Pacific
Source: Copernicus journal article supplement (doi:10.5194/cp-18-1295-2022), 2022-06-20
Supplement: Supplementary file 1 [file cp-18-1295-2022-supplement.zip › Table_S6.xlsx]

## Sheet: Table S6
Table S6. Tetraether lipid parameter values and fatty acid carbon isotope data for mid-Waipara River section samples. Isotope analyses were run in duplicate. Data from Taylor (2011)
Sample no.	Height	Unit1	Dino	TOC	δ13COM	CaCO3	Tetraetherlipid parameters			Fatty acid carbon isotopes (‰)
	(m)		zone2	(wt%)	(‰)	(wt%)	TEX86	TEX86H SST	BIT	Low molecular weight fatty acids					Medium molecular weight fatty acids							High molecular weight fatty acids										HMW
								(°C)		C16	C16	C18	C18	C16–18	C20	C20	C22	C22	C24	C24	C20–24	C26	C26	C28	C28	C30	C30	C32	C32	C26–32	C28–30	Mean
MW49	132.535	Ashley	PETM	0.4	-32	0.206513	0.856915	34.0129	0.047459	-28.28	-29.641			-28.9605	-31.383	-31.712	-32.303	-33.797	-33.022	-30.457	-32.1123	-31.672	-30.344	-29.31	-28.69	-31.115	-31.97	-28.966	-28.555	-30.0778	-30.2712	-30.0971
MW48	132.065	Ashley	PETM	0.5	-32.4	0.125642	0.814877	32.5187	0.0848338	-29.792	-28.397			-29.0945			-32.97	-34.309	-33.965	-31.513	-33.1893
MW47	131.975	Waipara Gst	NZDP8	0.2	-27.7
MW46	131.105	Waipara Gst	NZDP8	0.3	-26	0.00411071	0.589712	22.9118	0.0715241	-29.548	-29.464	-29.516	-29.72	-29.562	-28.273	-28.602	-30.405	-30.785	-29.709	-30.378	-29.692	-27.779	-28.695	-29.005	-29.741					-28.805	-29.373	-28.8997
MW45	130.655	Waipawa	NZDP8	0.7	-17.9	0.0347226	0.521472	19.2586	0.0914467	-29.232	-27.272			-28.252				-29.241		-29.984	-29.6125	-27.251	-30.873	-28.554	-26.159	-30.103	-29.5	-31.135	-30.77	-29.2931	-28.579	-29.2217
MW44	130.005	Waipawa	NZDP8	1.8	-19.2
MW43	129.525	Waipawa	NZDP8	0.9	-20.3	0.0263875	0.518541	19.0911	0.0938872	-27.409	-28.195	-28.19	-26.232	-27.5065	-27.898	-27.572	-28.4	-27.806	-27.509	-27.064	-27.7082	-28.462	-29.214	-26.539	-28.482	-28.761	-29.726	-29.695	-29.232	-28.7639	-28.377	-28.7252
MW42	129.255	Waipawa	NZDP8	1.1	-19.1	0.0474369	0.500379	18.032	0.105622	-29.013	-28.039	-23.513	-29.524	-27.5223	-28.553	-29.918	-31.355	-31.528	-29.661	-29.375	-30.065	-31.565	-30.283	-31.869	-28.741	-28.305	-28.507	-29.449	-29.927	-29.8308	-29.3555	-29.7832
MW41	129.055	Waipawa	NZDP8	1.5	-20.2
MW40	128.375	Waipawa	NZDP8	1.6	-17.6	0.0538911	0.497235	17.8448	0.0823583	-25.892	-27.27			-26.581	-23.193	-23.43	-23.011	-23.291	-22.087	-22.498	-22.92	-24.864	-24.529	-27.619	-27.847	-29.011	-30.107	-30.042	-31.324	-28.1679	-28.646	-28.2157
MW39	126.385	Waipawa	NZDP8	0.5	-21.9	0.0341286	0.554683	21.0927	0.0940012	-28.954	-30.449	-31.696	-27.503	-29.6505	-29.166	-28.613	-31.829	-30.698	-30.957	-31.422	-30.4475	-31.324	-30.624	-28.616	-29.408	-28.933	-28.773	-30.326	-29.858	-29.7327	-28.9325	-29.6527
MW38	125.235	Waipawa	NZDP7	0.5	-21	0.0093369	0.539793	20.2844	0.0803535	-28.431	-28.249	-29.544	-29.819	-29.0108	-27.535	-28.71	-30.636	-30.492	-29.854	-29.521	-29.458	-30.214	-30.247	-30.745	-32.223	-29.562	-29.398	-29.111	-29.918	-30.1773	-30.482	-30.2077
MW37	123.515	Waipawa	NZDP7	0.4	-23.6	0.0342506	0.549611	20.8198	0.067958	-27.991	-28.031	-27.014	-27.192	-27.557	-27.257	-26.854	-29.426	-28.728	-27.088	-27.469	-27.8037	-27.318	-27.577	-30.045	-29.647	-32.757	-30.503	-29.229	-29.651	-29.5909	-30.738	-29.7056
MW36	122.295	Waipara Gst	NZDP7	0.2	-26
MW35	121.145	Waipara Gst	NZDP7	0.4	-25.8	0.0182202	0.552105	20.9543	0.0699837	-29.691	-31.499	-29.663	-29.611	-30.116	-30.401	-31.341	-31.232	-32.199	-30.56	-31.267	-31.1667	-31.133	-32.259	-31.06	-31.205	-30.444	-30.782	-29.689	-29.914	-30.8107	-30.8727	-30.8169
MW34	119.625	Waipara Gst	NZDP7	0.4	-26.1	0.0165756	0.549091	20.7917	0.0801019	-28.469	-30.067	-29.04	-27.743	-28.8297	-29.713	-28.514	-30.731	-31.787	-29.237	-29.502	-29.914	-30.245	-30.572	-28.618	-28.964	-31.095	-31.117	-30.451	-30.27	-30.1665	-29.9485	-30.1447
MW33	117.925	Waipara Gst	NZDP7	0.2	-29.4	0.0179792	0.587886	22.8197	0.061872	-30.259	-30.257			-30.258					-32.377	-31.587	-31.982
MW32	116.405	Waipara Gst	NZDP7	0.1	-28.7
MW31	114.885	Waipara Gst	NZDP7	0.2	-29	0.0143595	0.551821	20.939	0.062	-28.736	-28.878	-31.102	-30.105	-29.7053	-30.768	-30.438	-32.798	-32.75	-31.888	-31.8	-31.7403	-31.923	-31.931	-31.085	-30.95	-30.154	-29.478	-31.271	-30.358	-30.8938	-30.4168	-30.8461
MW30	112.175	Waipara Gst	NZDP7	0.34	-26.5
MW29	110.075	Waipara Gst	NZDP7	0.110673	-26.0596	0.0292946	0.544378	20.5356	0.051862	-29.641	-29.009	-28.531	-29.009	-29.0475	-29.281	-28.336	-30.929	-30.976	-28.705	-28.169	-29.3993	-28.703	-29.561	-29.276	-29.258	-29.838	-29.362	-30.755	-31.194	-29.7434	-29.4335	-29.7124
MW52	101.165	Waipara Gst	NZDP7	0.109839	-27.0058	0.00490952	0.561354	21.4478	0.0668363	-31.534	-31.144	-32.815	-32.972	-32.1163	-33.387	-33.076	-34.202	-33.98	-33.507	-33.81	-33.6603	-34.349	-34.321	-33.923	-33.377	-29.82	-30.099	-31.178	-30.527	-32.1992	-31.8048	-32.1598
MW53	93.695	Waipara Gst	NZDP6	0.218993	-26.024	0.0440893	0.576865	22.2575	0.05	-30.246	-29.279	-31.427	-31.873	-30.7063	-32.15	-31.397	-33.08	-32.913	-32.024	-31.936	-32.25	-31.234	-32.124	-32.138	-31.604	-33.597	-34.604	-33.536	-33.067	-32.738	-32.9857	-32.7628
MW54	88.675	Waipara Gst	NZDP6	0.38	-25.7
MW56	79.655	Waipara Gst	NZDP5	0.23	-27.1	0.0427952	0.597046	23.279	0.0506029	-33.14	-33.218	-35.828	-35.581	-34.4417	-33.091	-33.497	-32.952	-32.852	-32.252	-32.335	-32.8298	-32.638	-33.071	-32.456	-33.257	-30.16	-33.063			-32.4408	-32.234	-32.415
MW57	70.415	Waipara Gst	NZDP5	0.14	-27	0.241549	0.591863	23.0199	0.0600955	-30.324	-32.252	-31.253	-33.442	-31.8178	-33.713	-32.725	-33.714	-34.485	-33.246	-33.604	-33.5812	-33.166	-34.052	-31.649	-33.099	-31.486	-32.391	-31.309	-31.597	-32.3436	-32.1562	-32.3249
MW58	64.805	Waipara Gst	NZDP5	0.0684913	-27.5441	0.284101	0.56293	21.5311	0.0691732	-30.164	-30.324	-30.314	-29.971	-30.1932	-32.987	-32.9	-33.156	-32.906	-32.272	-32.306	-32.7545	-32.639	-33.043	-33.06	-32.617	-34.212	-33.866			-33.2395	-33.4387	-33.2644
MW59	63.835	Loburn	NZDP5	0.19	-27.7
MW60	62.225	Loburn	NZDP4	0.264002	-27.0642	0.7301	0.583505	22.5975	0.0630825	-30.763	-30.343	-32.384	-31.55	-31.26	-31.926	-32.3	-33.115	-33.147	-30.785	-30.43	-31.9505	-32.584	-31.546	-33.116	-32.518	-32.246	-31.734	-32.166	-31.843	-32.2191	-32.4035	-32.2376
MW62	58.315	Loburn	NZDP4	0.441595	-27.8613	1.01113	0.628067	24.7836	0.0652366	-31.91	-31.845	-32.221	-32.845	-32.2052	-34.304	-34.403	-34.121	-33.759	-33.59	-33.861	-34.0063	-34.013	-34.011	-33.754	-33.47					-33.812	-33.612	-33.7787
MW63	53.815	Loburn	NZDP4	0.55	-27.7	0.923794	0.583239	22.5839	0.0539371	-29.318	-29.894	-30.266	-30.162	-29.91	-31.546	-32.015	-32.669	-32.406	-32.14	-31.581	-32.0595	-31.245	-31.884	-31.659	-30.677	-33.143	-33.128	-32.78	-32.029	-32.0681	-32.1517	-32.0765
	Correlation (r)		TOC	1	0.82571	-0.061484	-0.687083	-0.708775	0.667244	0.670847	0.587727	0.632866	0.465615	0.668026	0.730789	0.641886	0.791909	0.795422	0.747888	0.741936	0.762611	0.588128	0.680032	0.520473	0.628884	0.52024	0.421506	0.406885	0.211919	0.60149	0.583195	0.583195
			δ13COM	0.82571	1	-0.346219	-0.808285	-0.818977	0.794819	0.637975	0.68978	0.63341	0.553129	0.699334	0.812176	0.742707	0.764925	0.784082	0.754438	0.686284	0.742889	0.661172	0.653357	0.624888	0.726986	0.587466	0.578453	0.547485	0.370619	0.728248	0.733293	0.733293
			TEX86	-0.687083	-0.808285	0.544334	1	0.999331	-0.696658	-0.763537	-0.77033	-0.736369	-0.674554	-0.818757	-0.77499	-0.744926	-0.706212	-0.709283	-0.738867	-0.737435	-0.751565	-0.610251	-0.640922	-0.60254	-0.741039	-0.620814	-0.712804	-0.657368	-0.524151	-0.748187	-0.763454	-0.763454
	Mean WOF (>1.5% TOC, MW40)			1.6	-17.6	0.0538911	0.497235	17.8448	0.0823583	-25.892	-27.27	0	0	-26.581	-23.193	-23.43	-23.011	-23.291	-22.087	-22.498	-22.92	-24.864	-24.529	-27.619	-27.847	-29.011	-30.107	-30.042	-31.324	-28.1679	-28.646	-28.2157
	Mean pre-WOF (MW29-36)			0.243834	-27.1949	0.0192858	0.557056	21.208	0.0651639	-29.3592	-29.942	-29.584	-29.117	-29.5913	-30.0408	-29.6573	-31.4225	-31.928	-30.5534	-30.465	-30.8405	-30.501	-31.0808	-30.0098	-30.0942	-30.3828	-30.1848	-30.5415	-30.434	-30.4036	-30.1679	-30.38
1 Waipawa organofacies is within the Waipara Greensand
2 New Zealand dinoflagellate zones (Crouch et al., 2014). PETM = Paleocene–Eocene Thermal Maximum
