# Supplementary material for: Late Paleocene CO 2 drawdown, climatic cooling and terrestrial denudation in the southwest Pacific
Source: Copernicus journal article supplement (doi:10.5194/cp-18-1295-2022), 2022-06-20
Supplement: Supplementary file 1 [file cp-18-1295-2022-supplement.zip › Table_S7.xlsx]

## Sheet: Table S7
Table S7. Bulk carbonate stable carbon isotope values and revised age estimates for Mead Stream samples
Data sources: Hollis et al., 2005, 2014; Andrew, 2010; this study
Sample no.	Height	Formation	Carbonate		%COM	δ13COM	Tiepoints	LSR	Age
	(m)		δ13C (‰)	Wt. (%)	(%)	(‰)		m/Ma	(Ma)
MD-G11	157.25	Dee Marl	1.41				55.93	11.0217	55.93
MSPE107	157.17	Amuri Lst	2.11					11.0217	55.9373
MSPE106	157.07	Amuri Lst	2.1					11.0217	55.9463
MSPE104	156.95	Amuri Lst	2.17					11.0217	55.9572
MSPE103	156.9	Amuri Lst	2.16					11.0217	55.9618
MSPE102	156.86	Amuri Lst	2.15					11.0217	55.9654
MSPE101	156.82	Amuri Lst	2.22					11.0217	55.969
MSPE99	156.67	Amuri Lst	2.28					11.0217	55.9826
MSPE98	156.61	Amuri Lst	2.28					11.0217	55.9881
MSPE97	156.55	Amuri Lst	2.25					11.0217	55.9935
MSPE96	156.47	Amuri Lst	2.28					11.0217	56.0008
MD-G10	156.4	Amuri Lst	2.44					11.0217	56.0071
MSPE94	156.33	Amuri Lst	2.36					11.0217	56.0135
MD-G9	155.59	Amuri Lst	2.31					11.0217	56.0806
MD-G8	154.71	Amuri Lst	2.25					11.0217	56.1605
MD-G7	153.9	Amuri Lst	2.48					11.0217	56.2339
MS/J1	153.69	Amuri Lst	2.91					11.0217	56.253
MD-G6	152.89	Amuri Lst	2.47					11.0217	56.3256
MS/J2	151.96	Amuri Lst	3.12					11.0217	56.41
MD-G5	151.8	Amuri Lst	2.69					11.0217	56.4245
MD-G4	151.01	Amuri Lst	2.89					11.0217	56.4962
MS/J3	150.34	Amuri Lst	2.98					11.0217	56.5569
MD-G3	150.09	Amuri Lst	2.94					11.0217	56.5796
MD-G2	149.14	Amuri Lst	3.18					11.0217	56.6658
MS/J4	148.73	Amuri Lst	3.03					11.0217	56.703
MD-G1	148.31	Amuri Lst	3.09					11.0217	56.7411
MS/J5	147.11	Amuri Lst	2.81				56.85	25.8	56.85
MS/J6	144.86	Amuri Lst	3.07					25.8	56.9372
MS/J6B	143.61	Amuri Lst	3.23					25.8	56.9857
MS/J7	142.18	Amuri Lst	3.09					25.8	57.0411
MS/J39	141.47	Amuri Lst	3.28					25.8	57.0686
MS/J38	141.33	Amuri Lst	3.14					25.8	57.074
MS/J8	140.4	Amuri Lst	2.89					25.8	57.1101
MS/J37	140.01	Amuri Lst	3.05					25.8	57.1252
MS/J36	139.42	Amuri Lst	2.97					25.8	57.1481
MS/J9	138.78	Amuri Lst	3.31					25.8	57.1729
MS/J35	138.45	Amuri Lst	3.01					25.8	57.1857
MS/J33	138.04	Amuri Lst	2.92					25.8	57.2016
MS/J28	137.6	Amuri Lst	2.79					25.8	57.2186
MS/J24	137.09	Amuri Lst	2.77					25.8	57.2384
MS/J12	136.79	Amuri Lst	2.59				57.25	23.5222	57.25
MS/J13	136.63	Amuri Lst	2.76					23.5222	57.2568
MS/J15B	136.55	Amuri Lst	2.76					23.5222	57.2602
MS/J16	136.47	Amuri Lst	3.26					23.5222	57.2636
MS/J22	136.24	Amuri Lst	3.58					23.5222	57.2734
MS/J17	135.76	Amuri Lst	3.34					23.5222	57.2938
MS/J20	135.44	Amuri Lst	3.5					23.5222	57.3074
MS/J18	135.13	Amuri Lst	2.86					23.5222	57.3206
MS/J19B	134.75	Amuri Lst	3.28					23.5222	57.3367
MS/J19	132.38	Amuri Lst	3.2					23.5222	57.4375
BA-MD26	120.744	Amuri Lst	3.13					23.5222	57.9322
BA-MD25	118.32	Amuri Lst	3.14	76.79				23.5222	58.0352
MS-J31	118.03	Amuri Lst	3.27	69.6925				23.5222	58.0475
MS-J30	117.08	Amuri Lst	3.35	64.2504				23.5222	58.0879
BA-MD24	116.74	Amuri Lst	3.02	59.65				23.5222	58.1024
MS-J29	116.35	Amuri Lst	3.14	58.4109				23.5222	58.119
MD15-CH066	116.18	Amuri Lst	3.11					23.5222	58.1262
MD15-CH067	116.06	Amuri Lst	2.82		0.24	-25.6		23.5222	58.1313
MD15-CH068	115.89	Amuri Lst	3.02					23.5222	58.1385
MD15-CH069	115.75	Amuri Lst	3.03		0.55	-24.63		23.5222	58.1445
BA-MD23	115.72	Waipawa?	2.57	5.44	1.54	-20.8		23.5222	58.1457
MS23	115.63	Waipawa?	2.15	4.67542				23.5222	58.1496
BA-MD22	115.62	Waipawa?	2.46	7.69	0.94	-22	58.15	14.1429	58.15
MD15-CH070	115.6	Waipawa?	2.55		2.01	-20.2		14.1429	58.1514
BA-MD21	115.5	Waipawa?	1.67	2.86	2.41			14.1429	58.1585
MS26	115.44	Amuri Lst	2.82	14.67				14.1429	58.1627
MD15-CH071	115.422	Amuri Lst	2.94		0.55	-24.1		14.1429	58.164
MD15-CH072	115.25	Amuri Lst	2.89					14.1429	58.1761
MD15-CH073	115.031	Amuri Lst	2.95					14.1429	58.1917
BA-MD20	114.98	Amuri Lst	3.05	24.15	0.42			14.1429	58.1953
MD15-CH074	114.897	Amuri Lst	2.93					14.1429	58.2011
MD15-CH075	114.62	Amuri Lst	3.12					14.1429	58.2207
MD15-CH076	114.143	Amuri Lst	2.91					14.1429	58.2545
MD15-CH077	113.808	Amuri Lst	3.18		0.12	-26.6		14.1429	58.2781
MD15-CH078	113.388	Amuri Lst	3.33					14.1429	58.3078
MD15-CH079	112.968	Amuri Lst	3.35					14.1429	58.3375
MD15-CH080	112.729	Amuri Lst	3.37					14.1429	58.3544
MS14	112.53	Amuri Lst	3.22	70.488				14.1429	58.3685
MD15-CH081	112.299	Amuri Lst	3.33					14.1429	58.3848
MD15-CH082	111.726	Amuri Lst	3.37					14.1429	58.4253
MD15-CH084	111.64	Amuri Lst	3.09					14.1429	58.4314
MS15	111.53	Amuri Lst	3.32	63.27				14.1429	58.4392
BA-MD19	111.28	Amuri Lst	3.11	69.19	0.18	-25.8		14.1429	58.4569
BA-MD18C	111.18	Amuri Lst		6.59				14.1429	58.4639
BA-MD18H	111.18	Amuri Lst	2.99	81.91	0.31			14.1429	58.4639
MD15-CH083	111.058	Amuri Lst	3.33					14.1429	58.4726
MD15-CH085	110.876	Amuri Lst	3.1		0.34	-26.8		14.1429	58.4854
BA-MD17	110.67	Waipawa		1.91	2.64	-21.53	58.5	3.5875	58.5
MD15-CH086	110.655	Waipawa	2.99		0.71	-24.6		3.5875	58.5042
BA-MD16	110.54	Waipawa		1.33	1.44	-21.53		3.5875	58.5362
BA-MD15	110.48	Waipawa		2.05	1.83	-21.32		3.5875	58.553
MS12	110.24	Waipawa	1.95	1.26207				3.5875	58.6199
BA-MD14	110.08	Waipawa		1.91	2.83	-21.11		3.5875	58.6645
BA-MD13	109.9	Waipawa		1.12	0.32	-21.9		3.5875	58.7146
MS11	109.7	Waipawa	2.2	2.27				3.5875	58.7704
BA-MD12	109.24	Waipawa		0.83	5.5	-21.19		3.5875	58.8986
BA-MD10	108.84	Waipawa		2.06	4.35	-19.12		3.5875	59.0101
BA-MD09	108.72	Waipawa		1.25	1.54	-18.68		3.5875	59.0436
MD15-CH087	108.68	Waipawa			2.57	-19.5		3.5875	59.0547
MD15-CH088	108.505	Waipawa			1.78	-22		3.5875	59.1035
BA-MD08	108.46	Waipawa		1.37	3.24	-18.88		3.5875	59.116
BA-MD11	108.36	Waipawa		1.24	3.63	-21.21		3.5875	59.1439
MD15-CH089	108.355	Waipawa	1.25		0.87	-23.7		3.5875	59.1453
MS1A	108.3	Waipawa		3.63				3.5875	59.1606
BA-MD07	108.28	Waipawa		2.27	1.61	-21.09		3.5875	59.1662
MD15-CH090	108.165	Mead Hill	2.06					19.1	59.2809
BA-MD06	108.14	Mead Hill		23.64	0.69	-23.5		19.1	59.2822
MD15-CH091	108	Mead Hill	2.62					19.1	59.2895
BA-MD05	107.99	Mead Hill		18.04				19.1	59.2901
MD15-CH092	107.82	Mead Hill	3.29					19.1	59.299
MS18	107.8	Mead Hill	2.81	74.3718			59.3	19.1	59.3
MD15-CH093	107.34	Mead Hill	3.24					19.1	59.3241
BA-MD03	107.33	Mead Hill		36.55	0.13	-24.1		19.1	59.3246
BA-MD02	107.08	Mead Hill		39.69				19.1	59.3377
MD-F12	107.08	Mead Hill	2.78	78.2402				19.1	59.3377
MD15-CH094	106.94	Mead Hill	2.9		0.34	-26.6		19.1	59.345
BA-MD00	106.8	Mead Hill		59.82				19.1	59.3524
MD15-CH095	106.64	Mead Hill	2.92					19.1	59.3607
MD-F13	106.57	Mead Hill	2.82	63.043				19.1	59.3644
MD15-CH096	106.325	Mead Hill	2.81					19.1	59.3772
MD15-CH097	106.16	Mead Hill	3					19.1	59.3859
MD15-CH098	105.86	Mead Hill	3.07					19.1	59.4016
MD15-CH099	105.435	Mead Hill	2.84				59.3	19.1	59.4238
MD15-CH100	105.17	Mead Hill	3.1					19.1	59.4377
MD15-CH101	104.78	Mead Hill	3.34					19.1	59.4581
