# Supplementary material for: Late Paleocene CO 2 drawdown, climatic cooling and terrestrial denudation in the southwest Pacific
Source: Copernicus journal article supplement (doi:10.5194/cp-18-1295-2022), 2022-06-20
Supplement: Supplementary file 1 [file cp-18-1295-2022-supplement.zip › Table_S8.xlsx]

## Sheet: Table
Table S8. Estimates of atmospheric CO2 for the latest Paleocene
Recalibrated by Hollis et al., 2019.
Paleosols
Sample identifier	Age	CO2	CO2 low	CO2 high	Reference
	(Ma)	(ppm)	(ppm)	(ppm)
		50 percentile	16 percentile	84 percentile
?	56.5	428	214	856	Koch et al., 1992
?	55.4	460.8	230.4	921.6	Royer et al., 2001
?	55.725	486.8	243.4	973.6	Royer et al., 2001
?	55.943	579.2	289.6	1158.4	Royer et al., 2001
?	56.543	816.4	408.2	1632.8	Royer et al., 2001
?	56.954	474	237	948	Royer et al., 2001
Stomata
SLW 8612	56.1	307	297.756	320.992	Royer et al., 2001 (updated by Beerling et al., 2009)
SLW 9936	56.1	307	297.756	320.992	Royer et al., 2001 (updated by Beerling et al., 2009)
SLW 9050	56.141	307	297.756	320.992	Royer et al., 2001 (updated by Beerling et al., 2009)
SLW 9715	56.143	519.887	399.633	672.892	Royer et al., 2001 (updated by Beerling et al., 2009)
SLW 9434	56.163	303.667	297.447	310.748	Royer et al., 2001 (updated by Beerling et al., 2009)
SLW 9411	56.4	312.553	304.259	320.226	Royer et al., 2001 (updated by Beerling et al., 2009)
SLW 9155	56.464	315.515	305.148	324.966	Royer et al., 2001 (updated by Beerling et al., 2009)
Mean value		432.14
